# Supplementary material
Source: PubMed Central journal article supplement (PMC5992030)
Supplement: NIHMS944155-supplement-Supp_info.pdf [file NIHMS944155-supplement-Supp_info.pdf]

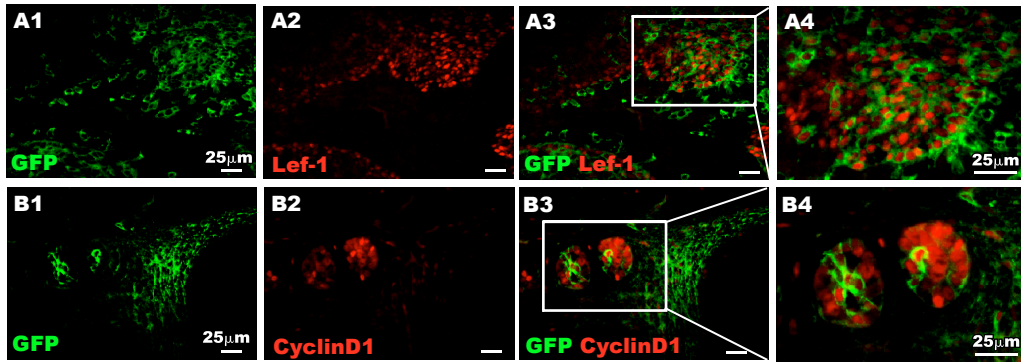

Supplemental Figure 1

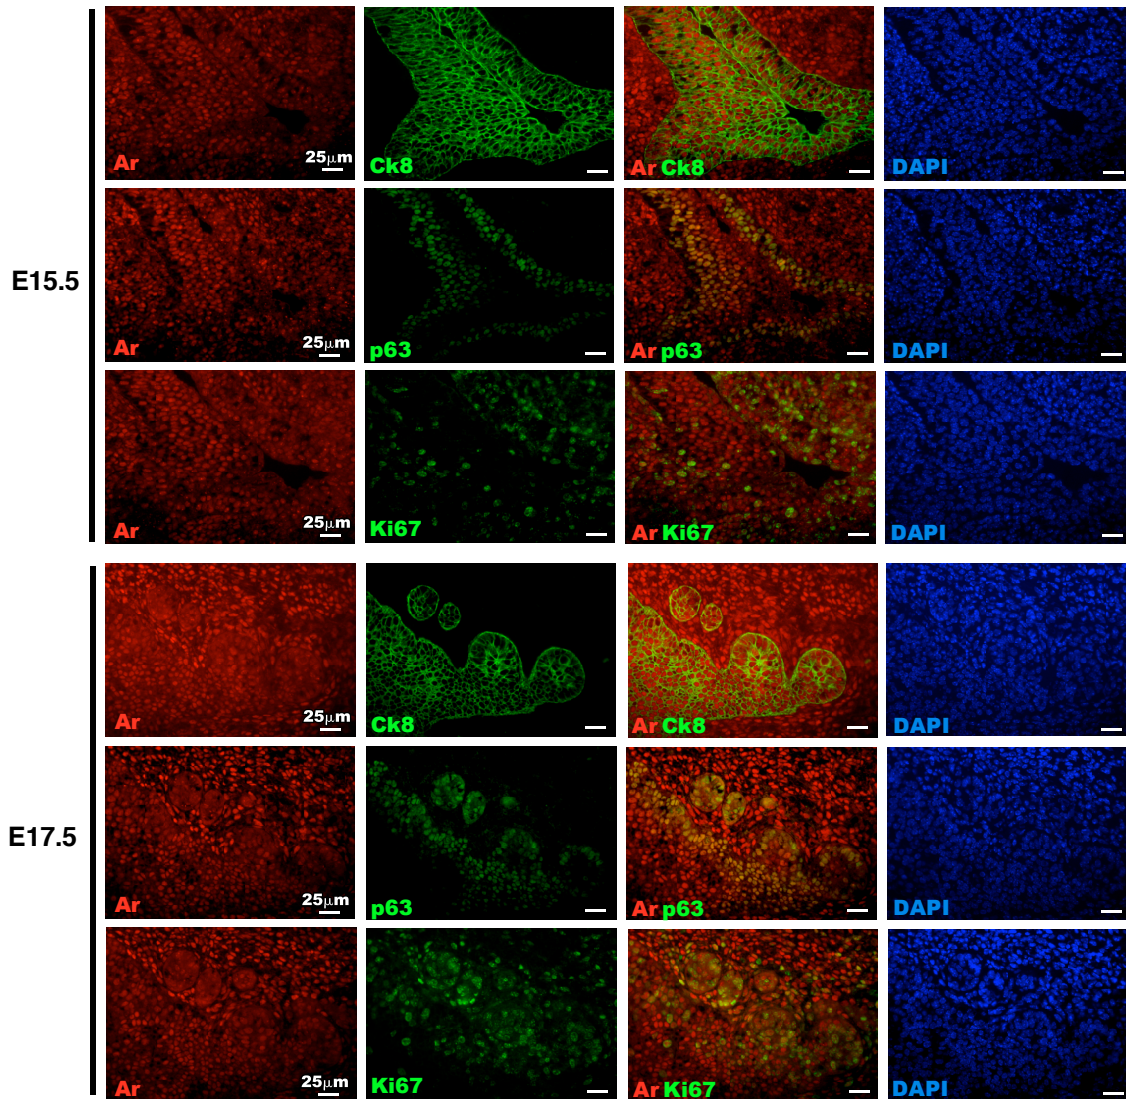

Supplemental Figure 2

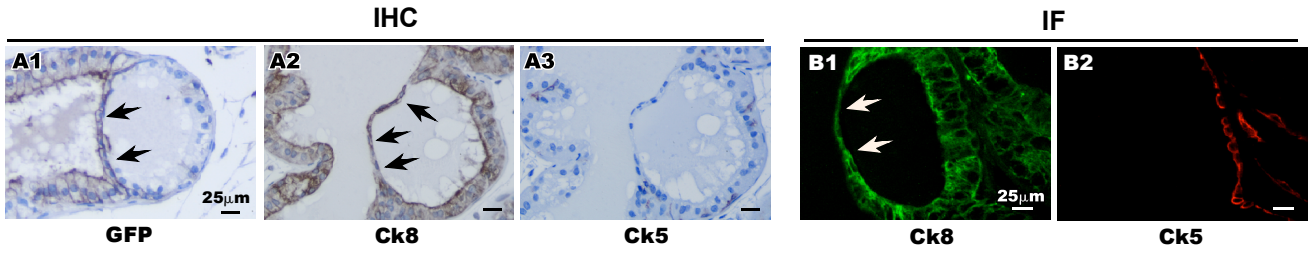

Supplemental Figure 3

Supplemental Table 1

| Supporting data for Figure 2 |             |             |                 |       |             |             |                 |
|------------------------------|-------------|-------------|-----------------|-------|-------------|-------------|-----------------|
| E15.5                        | GFP+ in UGE | GFP+ in UGM | GFP+UGE/GFP+UGM | E17.5 | GFP+ in UGE | GFP+ in UGM | GFP+UGE/GFP+UGM |
| #1                           | 29          | 72          | 40.3            | #1    | 231         | 396         | 58.3            |
| #2                           | 47          | 145         | 32.4            | #2    | 236         | 423         | 55.8            |
| #3                           | 47          | 109         | 43.1            | #3    | 309         | 421         | 73.4            |
| Total                        | 123         | 326         | 37.7            | Total | 776         | 1240        | 62.6            |
|                              |             | <b>Mean</b> | 38.6            |       |             | <b>Mean</b> | 62.5            |
|                              |             | <b>SD</b>   | 5.5             |       |             | <b>SD</b>   | 9.5             |

Supplemental Table 2

| Supporting data For Figure 3 I |              |             |            |                                 |              |             |            |
|--------------------------------|--------------|-------------|------------|---------------------------------|--------------|-------------|------------|
| R26RmTmG/+ Axin2CreERT2/+      | Ki67+ E-cad+ | Total E-cad | Percentage | R26RmTmG/+ ArL/Y Axin2CreERT2/+ | Ki67+ E-cad+ | Total E-cad | Percentage |
| #1                             | 122          | 826         | 14.8       | #1                              | 36           | 756         | 4.8        |
| #2                             | 102          | 881         | 11.6       | #2                              | 41           | 573         | 7.1        |
| #3                             | 130          | 748         | 17.4       | #3                              | 20           | 669         | 2.9        |
|                                |              | <b>Mean</b> | 14.6       |                                 |              | <b>Mean</b> | 4.9        |
|                                |              | <b>SD</b>   | 2.9        |                                 |              | <b>SD</b>   | 2.1        |
| R26RmTmG/+ Axin2CreERT2/+      | Ar+ E-cad+   | Total E-cad | Percentage | R26RmTmG/+ ArL/Y Axin2CreERT2/+ | Ar+ E-cad+   | Total E-cad | Percentage |
| #1                             | 851          | 857         | 99.3       | #1                              | 59           | 740         | 7.9        |
| #2                             | 890          | 903         | 98.6       | #2                              | 74           | 625         | 11.8       |
| #3                             | 727          | 731         | 99.5       | #3                              | 38           | 719         | 5.3        |
|                                |              | <b>Mean</b> | 99.1       |                                 |              | <b>Mean</b> | 8.3        |
|                                |              | <b>SD</b>   | 0.5        |                                 |              | <b>SD</b>   | 3.3        |

Supplemental Table 3

| Supporting data For Figure 4 D  |                                           |                                           |                                    |
|---------------------------------|-------------------------------------------|-------------------------------------------|------------------------------------|
| R26RmTmG/+ Axin2CreERT2/+       | Ki67 + cell in 1000 Epithelial cells (M1) | Ki67 + cell in 1000 Epithelial cells (M2) | Ki67+ in 1000 Epithelial cells(M3) |
| #1                              | 52                                        | 36                                        | 50                                 |
| #2                              | 45                                        | 40                                        | 42                                 |
| #3                              | 47                                        | 33                                        | 34                                 |
| <b>Mean</b>                     | 48                                        | 36.3                                      | 42                                 |
| <b>SD</b>                       | 2.9                                       | 2.9                                       | 6.5                                |
| R26RmTmG/+ ArL/Y Axin2CreERT2/+ | Ki67 + cell in 1000 Epithelial cells (M1) | Ki67 + cell in 1000 Epithelial cells (M2) | Ki67+ in 1000 Epithelial cells(M3) |
| #1                              | 14                                        | 15                                        | 21                                 |
| #2                              | 21                                        | 18                                        | 20                                 |
| #3                              | 23                                        | 12                                        | 14                                 |
| <b>Mean</b>                     | 19.3                                      | 15                                        | 18.3                               |
| <b>SD</b>                       | 3.9                                       | 2.4                                       | 3.1                                |

Supplemental Table 4

| Supporting data For Figure 5 D |                                           |                                           |                                    |
|--------------------------------|-------------------------------------------|-------------------------------------------|------------------------------------|
| R26RmTmG/+ Axin2CreERT2/+      | Ki67 + cell in 1000 Epithelial cells (M1) | Ki67 + cell in 1000 Epithelial cells (M2) | Ki67+ in 1000 Epithelial cells(M3) |
| #1                             | 52                                        | 42                                        | 50                                 |
| #2                             | 56                                        | 37                                        | 46                                 |
| #3                             | 49                                        | 44                                        | 44                                 |
| <b>Mean</b>                    | 52.3                                      | 41                                        | 47                                 |
| <b>SD</b>                      | 2.9                                       | 2.9                                       | 2.5                                |

  

| R26RmTmG/+ ArL/Y Axin2CreERT2/+ | Ki67 + cell in 1000 Epithelial cells (M1) | Ki67 + cell in 1000 Epithelial cells (M2) | Ki67+ in 1000 Epithelial cells(M3) |
|---------------------------------|-------------------------------------------|-------------------------------------------|------------------------------------|
| #1                              | 33                                        | 18                                        | 29                                 |
| #2                              | 26                                        | 27                                        | 24                                 |
| #3                              | 29                                        | 15                                        | 23                                 |
| <b>Mean</b>                     | 29.3                                      | 20                                        | 25.3                               |
| <b>SD</b>                       | 2.9                                       | 5.1                                       | 2.6                                |

Supplemental Table 5

| Supporting data For Figure 5 F Before Regeneration |                           |            |             |            |                                 |            |             |            |
|----------------------------------------------------|---------------------------|------------|-------------|------------|---------------------------------|------------|-------------|------------|
| AP                                                 | R26RmTmG/+ Axin2CreERT2/+ | GFP+ cells | Total cells | Percentage | R26RmTmG/+ ArL/Y Axin2CreERT2/+ | GFP+ cells | Total cells | Percentage |
| #1                                                 |                           | 74         | 574         | 13.1       | #1                              | 65         | 558         | 11.7       |
| #2                                                 |                           | 35         | 607         | 5.8        | #2                              | 18         | 543         | 3.3        |
| #3                                                 |                           | 45         | 549         | 8.2        | #3                              | 29         | 571         | 5.1        |
|                                                    |                           | Mean       |             | 9          |                                 | Mean       |             | 6.7        |
|                                                    |                           | SD         |             | 3.7        |                                 | SD         |             | 4.4        |
| DLP                                                | R26RmTmG/+ Axin2CreERT2/+ | GFP+ cells | Total cells | Percentage | R26RmTmG/+ ArL/Y Axin2CreERT2/+ | GFP+ cells | Total cells | Percentage |
| #1                                                 |                           | 56         | 507         | 11.2       | #1                              | 43         | 493         | 8.7        |
| #2                                                 |                           | 29         | 551         | 5.3        | #2                              | 17         | 522         | 3.3        |
| #3                                                 |                           | 32         | 486         | 6.7        | #3                              | 18         | 519         | 3.6        |
|                                                    |                           | Mean       |             | 7.7        |                                 | Mean       |             | 5.2        |
|                                                    |                           | SD         |             | 3.1        |                                 | SD         |             | 3          |
| VP                                                 | R26RmTmG/+ Axin2CreERT2/+ | GFP+ cells | Total cells | Percentage | R26RmTmG/+ ArL/Y Axin2CreERT2/+ | GFP+ cells | Total cells | Percentage |
| #1                                                 |                           | 48         | 511         | 9.5        | #1                              | 30         | 470         | 6.4        |
| #2                                                 |                           | 15         | 483         | 3.2        | #2                              | 5          | 454         | 1.1        |
| #3                                                 |                           | 22         | 479         | 4.7        | #3                              | 16         | 477         | 2.7        |
|                                                    |                           | Mean       |             | 5.8        |                                 | Mean       |             | 3.4        |
|                                                    |                           | SD         |             | 3.3        |                                 | SD         |             | 2.7        |
| Supporting data For Figure 5 F After Regeneration  |                           |            |             |            |                                 |            |             |            |
| AP                                                 | R26RmTmG/+ Axin2CreERT2/+ | GFP+ cells | Total cells | Percentage | R26RmTmG/+ ArL/Y Axin2CreERT2/+ | GFP+ cells | Total cells | Percentage |
| #1                                                 |                           | 1170       | 2408        | 48.6       | #1                              | 381        | 2270        | 16.8       |
| #2                                                 |                           | 1975       | 2634        | 75         | #2                              | 572        | 2436        | 23.5       |
| #3                                                 |                           | 1285       | 2536        | 50.7       | #3                              | 329        | 2098        | 15.7       |
|                                                    |                           | Mean       |             | 58.1       |                                 | Mean       |             | 18.7       |
|                                                    |                           | SD         |             | 14.7       |                                 | SD         |             | 4.2        |
| DLP                                                | R26RmTmG/+ Axin2CreERT2/+ | GFP+ cells | Total cells | Percentage | R26RmTmG/+ ArL/Y Axin2CreERT2/+ | GFP+ cells | Total cells | Percentage |
| #1                                                 |                           | 1039       | 2083        | 49.9       | #1                              | 312        | 2095        | 14.9       |
| #2                                                 |                           | 818        | 2217        | 36.9       | #2                              | 519        | 1974        | 26.3       |
| #3                                                 |                           | 1016       | 2259        | 45         | #3                              | 342        | 1935        | 17.7       |
|                                                    |                           | Mean       |             | 43.9       |                                 | Mean       |             | 19.6       |
|                                                    |                           | SD         |             | 6.6        |                                 | SD         |             | 5.9        |
| VP                                                 | R26RmTmG/+ Axin2CreERT2/+ | GFP+ cells | Total cells | Percentage | R26RmTmG/+ ArL/Y Axin2CreERT2/+ | GFP+ cells | Total cells | Percentage |
| #1                                                 |                           | 567        | 1978        | 28.7       | #1                              | 189        | 1807        | 10.5       |
| #2                                                 |                           | 628        | 1969        | 31.9       | #2                              | 367        | 1942        | 18.9       |
| #3                                                 |                           | 702        | 2013        | 34.9       | #3                              | 167        | 1883        | 8.9        |
|                                                    |                           | Mean       |             | 31.8       |                                 | Mean       |             | 12.8       |
|                                                    |                           | SD         |             | 3.1        |                                 | SD         |             | 5.4        |
